# Supplementary material for: Modulation of Gut Microbiota by Low Methoxyl Pectin Attenuates Type 1 Diabetes in Non-obese Diabetic Mice
Source: PubMed Central journal article supplement (PMC6682655; doi:10.3389/fimmu.2019.01733), 2019-07-30
Supplement: Table_1.pdf [file Table_1.pdf]

Supplementary Table 1. Antibodies and reagents used for flow cytometry

---

| Anti-                | Dilution | Manufacturer  | Cat. #: |
|----------------------|----------|---------------|---------|
| CD45                 | 1:20     | BD Pharmingen | 553079  |
| CD4                  | 1:20     | BD Pharmingen | 552775  |
| CD25                 | 1:20     | BD Pharmingen | 557192  |
| Foxp3                | 1:50     | ebioscience   | 12-5773 |
| Transcription Factor |          | BD Pharmingen | 562574  |
| Buffer Set           |          |               |         |

---
